# Supplementary material
Source: PubMed Central journal article supplement (PMC4445920)

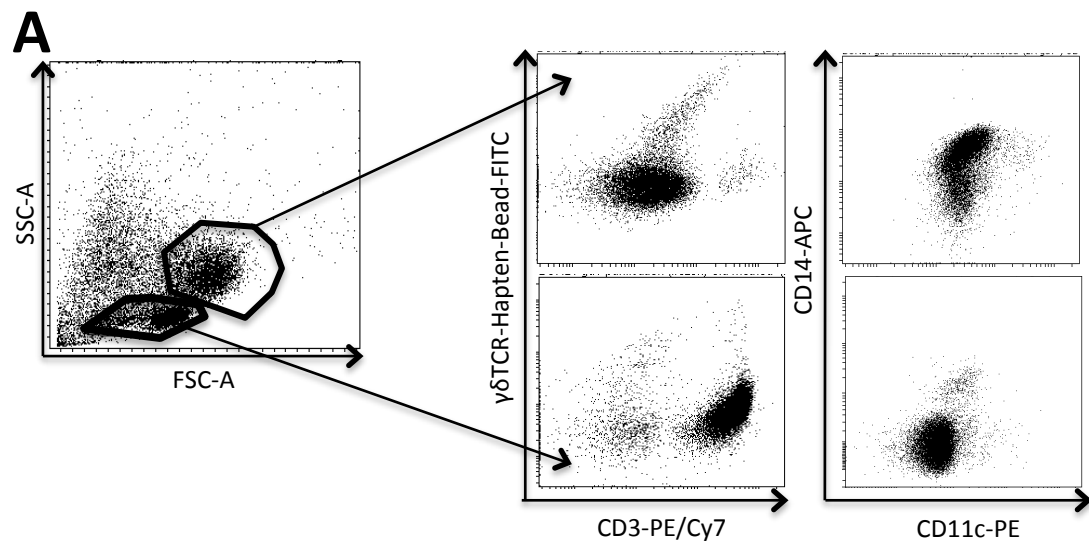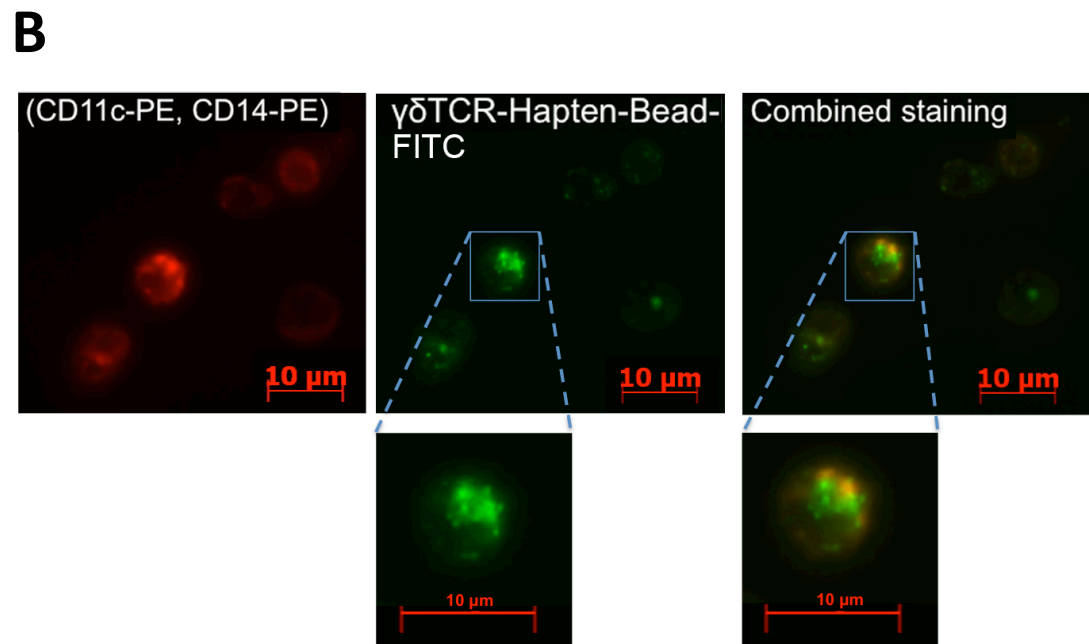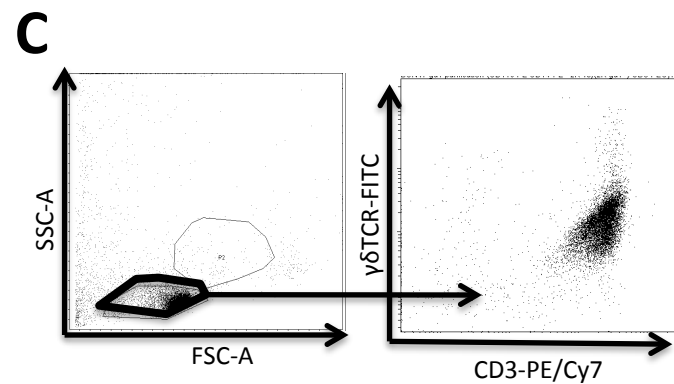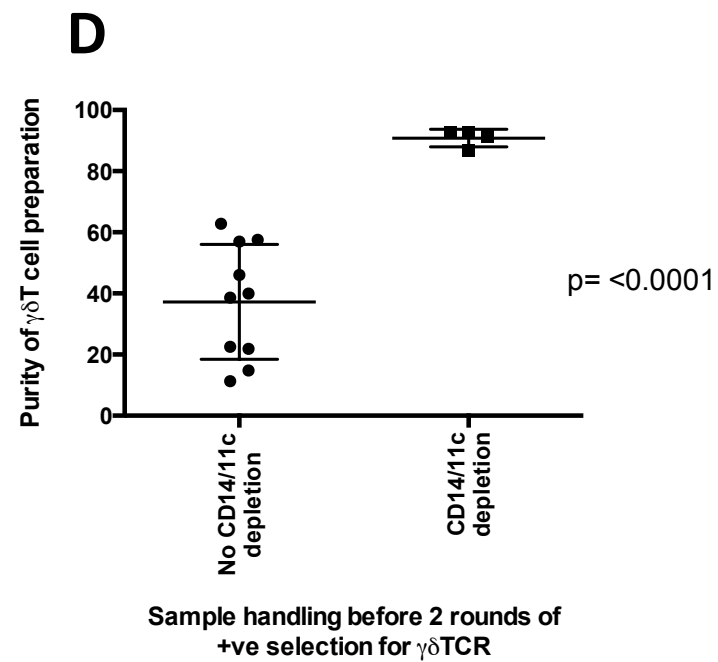

Supplementary figure 1

Supplement: NIHMS59036-supplement-1.pdf [file NIHMS59036-supplement-1.pdf]

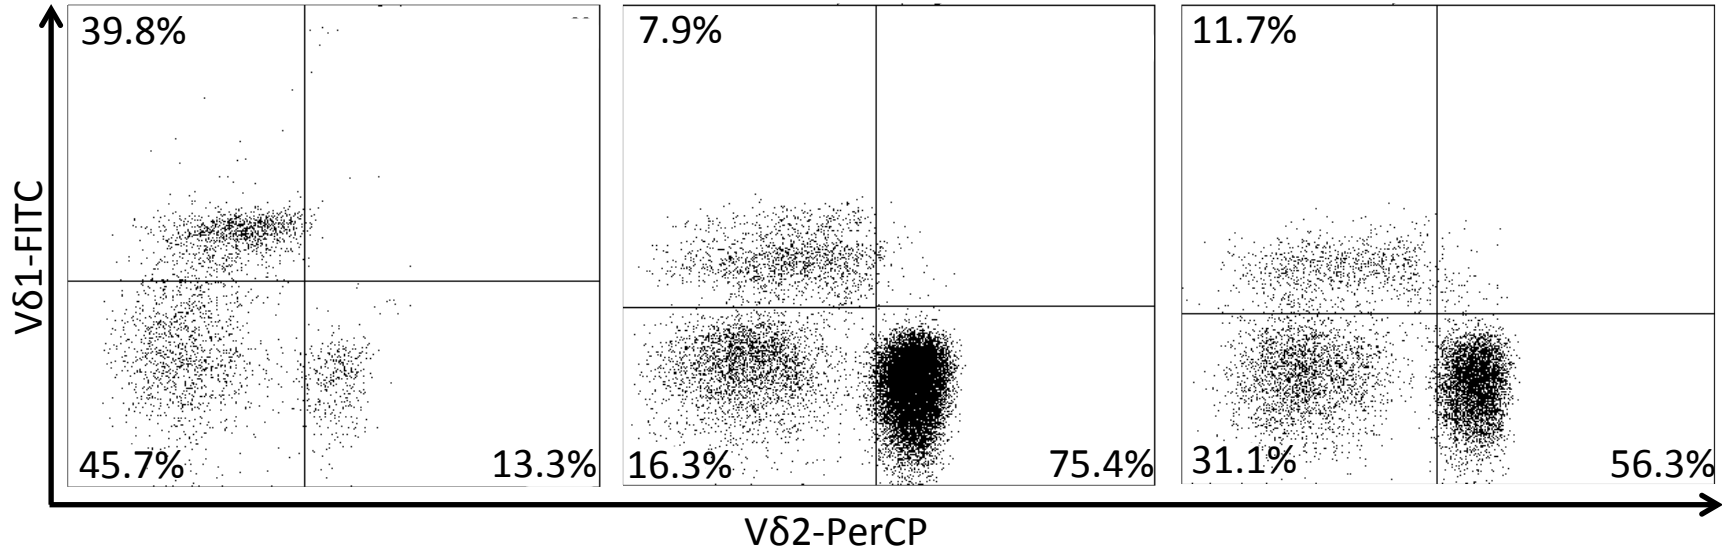

**Supplementary figure 3**

Supplement: NIHMS59036-supplement-3.pdf [file NIHMS59036-supplement-3.pdf]

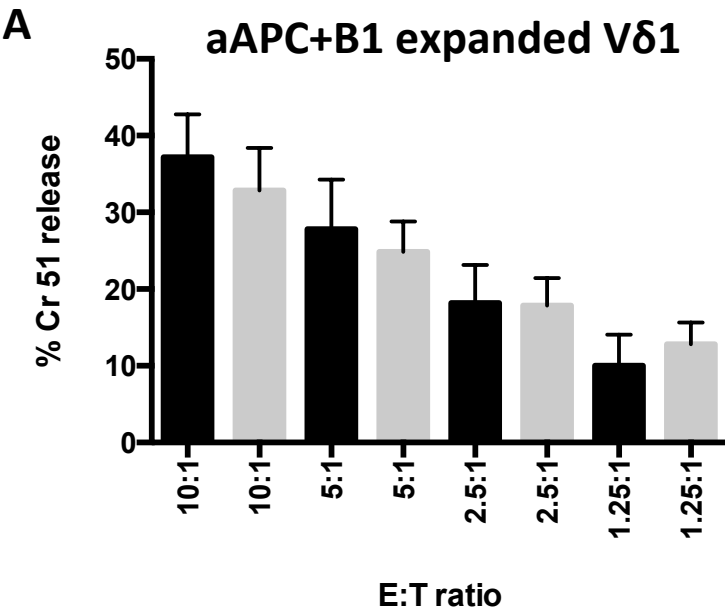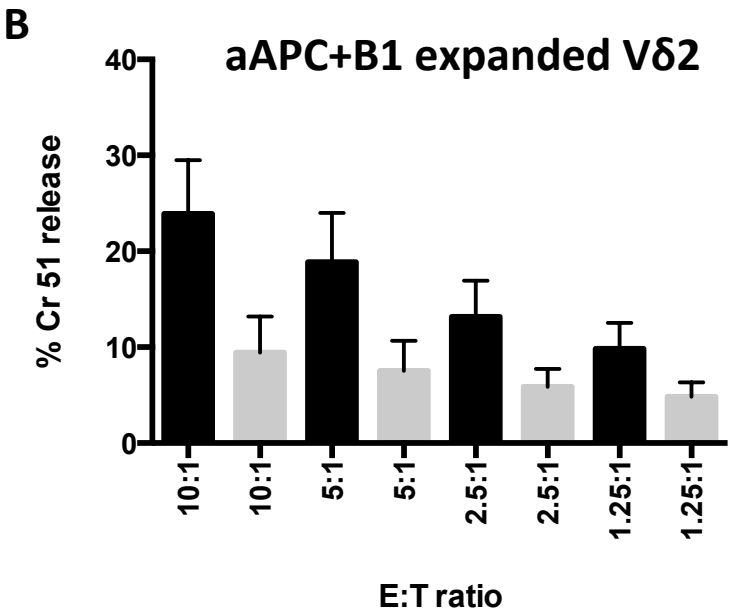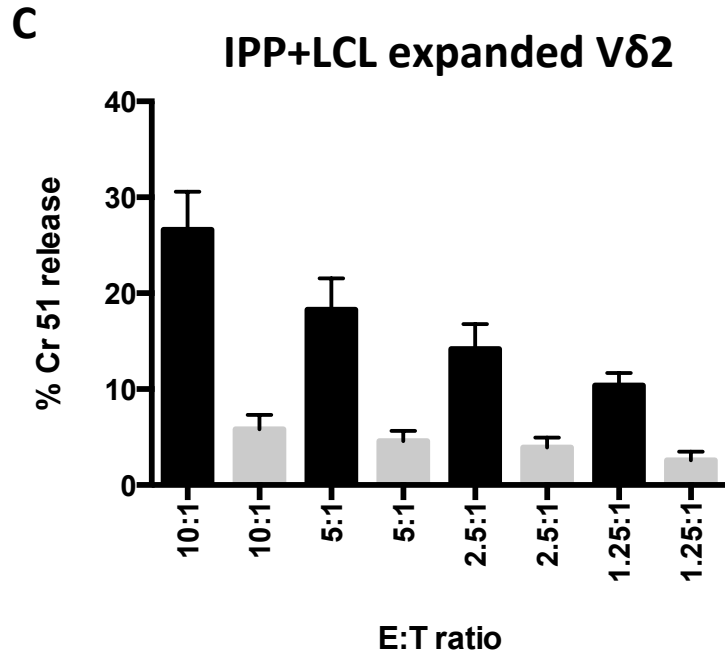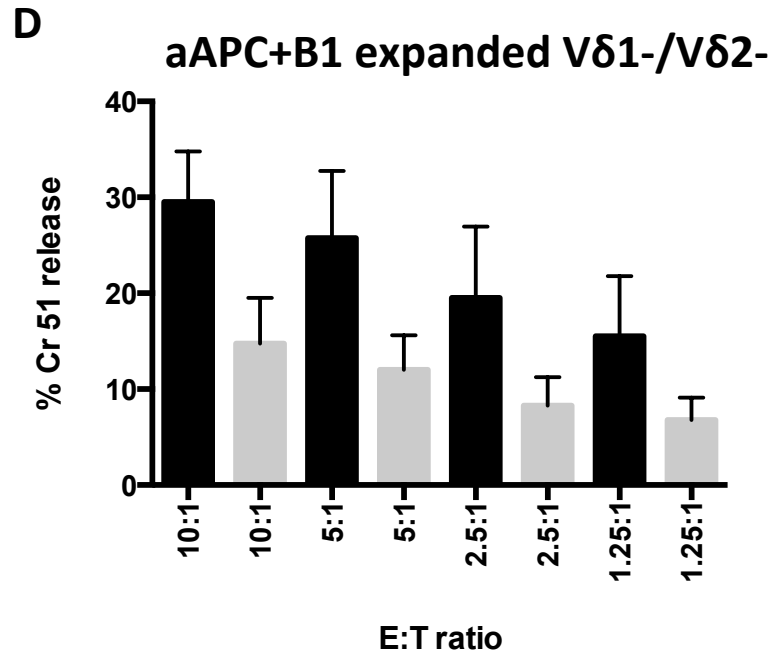

Supplementary Figure 4

Supplement: NIHMS59036-supplement-4.pdf [file NIHMS59036-supplement-4.pdf]

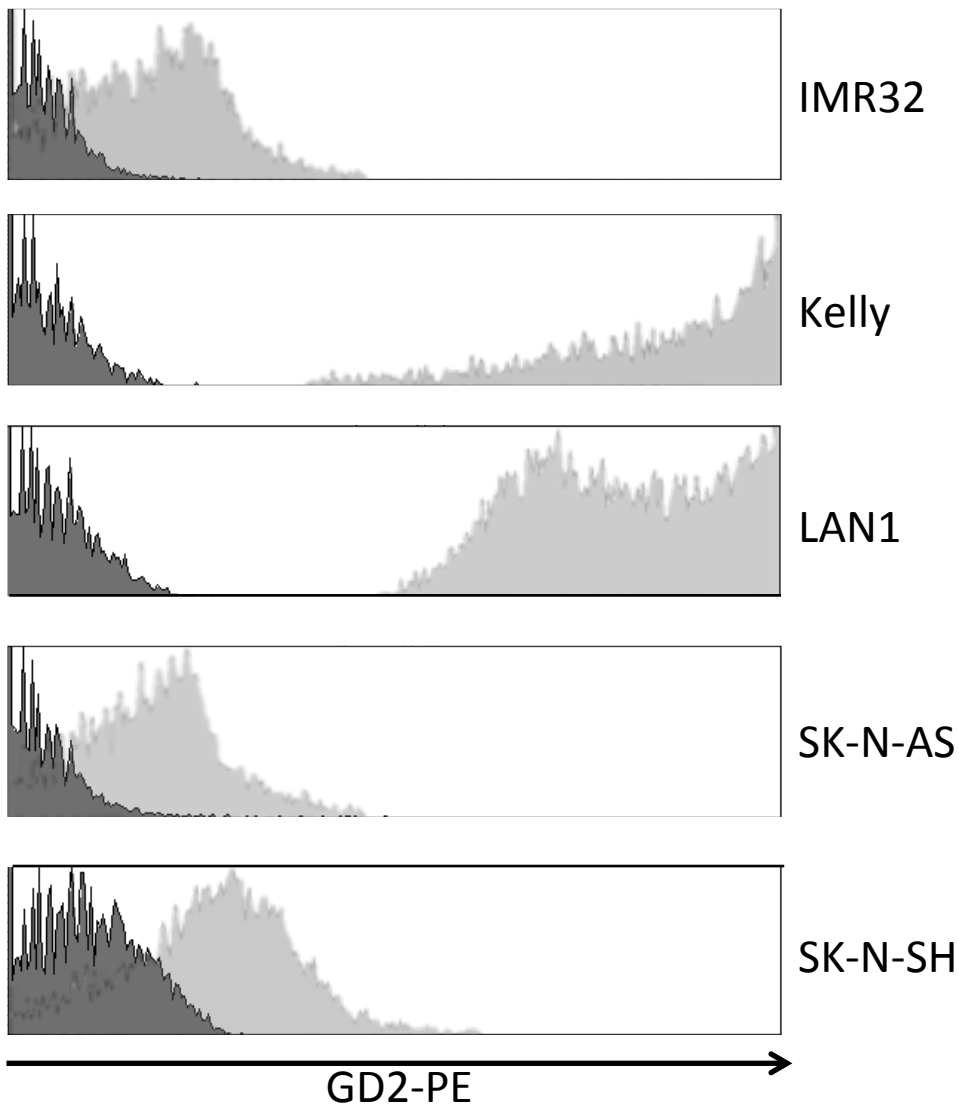

**Supplementary figure 5**

Supplement: NIHMS59036-supplement-5.pdf [file NIHMS59036-supplement-5.pdf]

**A**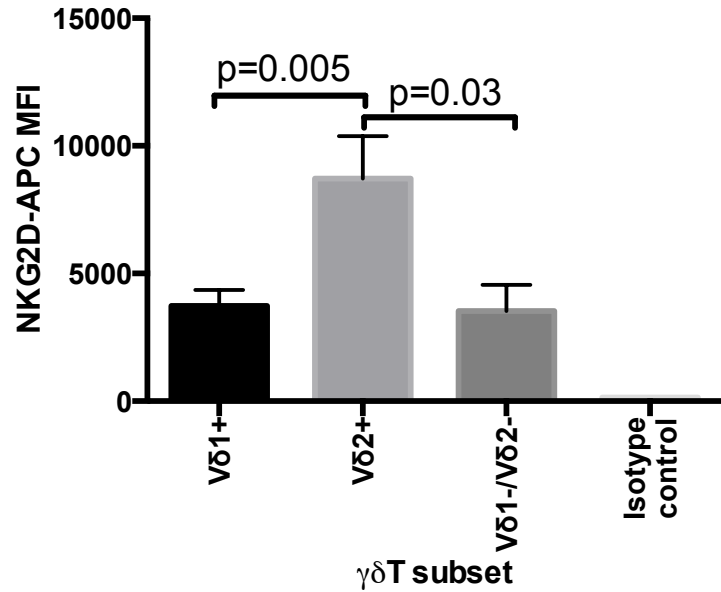**B**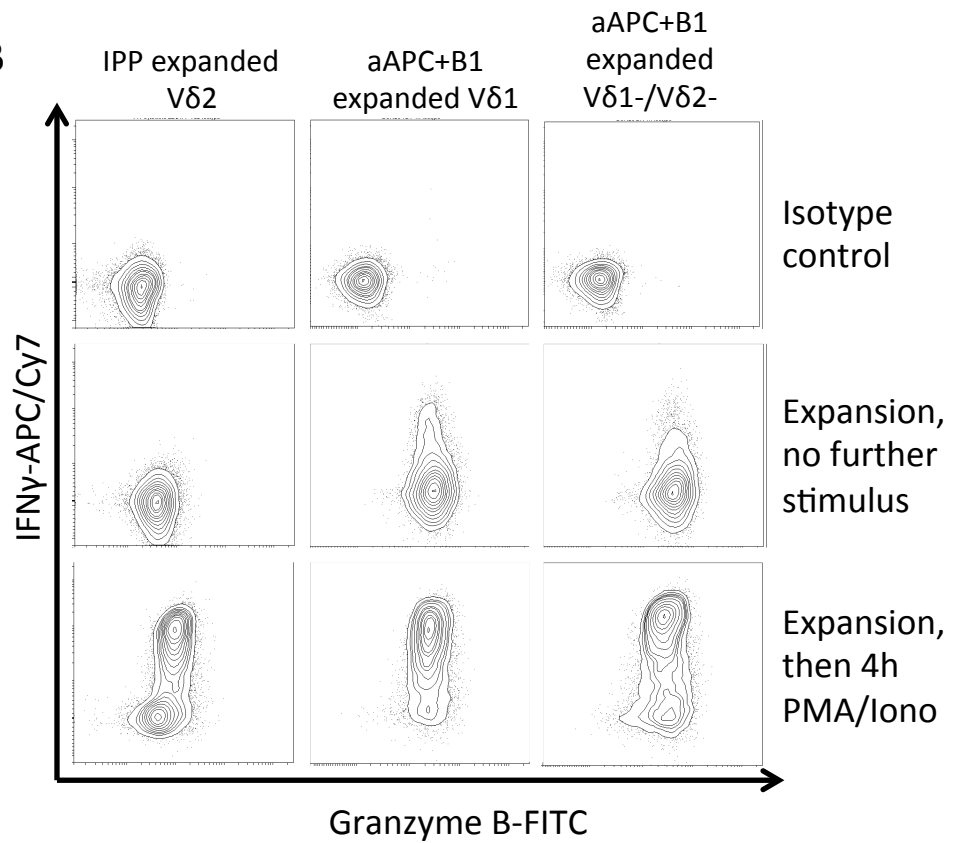

Supplementary figure 6

Supplement: NIHMS59036-supplement-6.pdf [file NIHMS59036-supplement-6.pdf]
